# Supplementary material
Source: Research Square preprint supplement (doi:10.21203/rs.3.rs-7257776/v1)
Supplement: Supplementary file 1 [file 0e54a13087a7099726549312.docx]

| **Name** | **Primer sequence**  (5’→ 3’, fw = forward, rv = reverse) |
| --- | --- |
| NF-κB | FW: CCA GAT TCG ATT TTA TGA AGA GG  RV: GAG TTT TGA AGA CAA TGG CAA AT |
| IκBα | FW: GTC AAG GAG CTG CAG GAG AT  RV: GAT GGC CAA GTG CAG GAA |
| IL-1β | FW: AGC TGA TGG CCC TAA ACA GA  RV: GTC GGA GAT TCG TAG CTG GA |
| IL-18 | FW: CAA CAA ACT ATT TGT CGC AGG A  RV: CAA AGT AAT CTG ATT CCA GGT TTT C |
| IL-6 | FW: GGT ACA TCC TCG ACG GCA TCT  RV: GTG CCT CTT TGC TGC TTT CAC |
| TLR4 | FW: AAG AAG GGG TGC CTC CAT  RV: CCA CAC CGG GAA TAA AGT CTC |
| TNF-α | FW: CAG CCT CTT CTC CTT CCT GAT  RV: GCC AGA GGG CTG ATT AGA GA |
| Cox1 | FW: CCC TCC CTT AGC AGG GAA C  RV: TGA AAT TGA TGG CCC CTA AG |
| Nd4 | FW: CCT ATT TAG CTG TTC CCC AAC C  RV: TCA CTG GAT AAG TGG CGT TG |
| Ndusf1 | FW: AGA GCC TCA CAG ACA ATG GC  RV: ATC TGC GGC AAA ACT GGG AT |
| Sirt3 | FW: CGG CTC TAC ACG CAG AAC AT  RV: TCA CGT CAG CCC GAA TGT C |
| TFAM | FW: GTG GTT TTC ATC TGT CTT GGC AAG  RV: TTC CCT CCA ACG CTG GGC AAT T |
| Sirt1 | FW: GAC TCC AAG GCC ACG GAT AG  RV: TGT TCG AGG ATC TGT GCC AA |
| NRF1 | FW: GTA CAA GAG CAT GAT CCT GGA  RV: GCT CTT CTG TGC GGA CAT C |
| NRF2 | FW: CAC ATC CAG TCA GAA ACC AGT GG  RV: GGA ATG TCT GCG CCA AAA GCT G |
| HPRT | FW: CTT TGC TGA CCT GCT GGA TT  RV: TAT GTC CCC TGT TGA CTG GT |
| GAPDH | FW: GAA GGT GAA GGT CGG AGT CA  RV: AAT GAA GGG GTC ATT GAT GG |

**Suppl. table 2:** Primer sequences. Exon spanning primers were used.
