# Supplementary material
Source: Research Square preprint supplement (doi:10.21203/rs.3.rs-7257776/v1)
Supplement: Supplementary file 2 [file cdc11384aa75c1c2bde787b1.docx]

**Suppl. table 1:** Admission diagnoses of the control group.

| **Admission diagnosis** | **Percent (%)** |
| --- | --- |
| Pneumonia | 40 |
| Fracture | 20 |
| Cholangitis | 10 |
| Congestive heart failure | 10 |
| Endocarditis | 5 |
| Wound infection | 5 |
| SIRS | 5 |
| Stroke | 5 |

SIRS: Systemic Inflammatory Response Syndrome
